# Supplementary material
Source: PubMed Central journal article supplement (PMC3863977)
Supplement: supp_01.CPJ.0000437088.98407.fa_e-References.pdf [file supp_01.CPJ.0000437088.98407.fa_e-References.pdf]

#### Supplemental data: e-references

- e-1. Taub E, Uswatte G, Pidikiti R. Constraint-Induced Movement Therapy: a new family of techniques with broad application to physical rehabilitation--a clinical review. *J Rehab Res Dev* 1999; 36: 237-251.
- e-2. Wolf SL, Thompson PA, Winstein CJ, et al. The EXCITE Stroke Trial: Comparing Early and Delayed Constraint-Induced Movement Therapy. *Stroke* 2010; 41: 2309-2315.
- e-3. Geerdink Y, Aarts P and Geurts AC. Motor learning curve and long-term effectiveness of modified constraint-induced movement therapy in children with unilateral cerebral palsy: a randomized controlled trial. *Res Dev Disabil* 2013; 34: 923-931.
- e-4. Deppe W, Thuemmler K, Fleischer J, Berger C, Meyer S and Wiedemann B. Modified constraint-induced movement therapy versus intensive bimanual training for children with hemiplegia—a randomized controlled trial. *Clin Rehabil* 2013; e-pub ahead of print.
- e-5. Taub E. The Behavior-Analytic Origins of Constraint-Induced Movement Therapy: An Example of Behavioral Neurorehabilitation. *Beh Analyst* 2012; 35: 155-178.
- e-6. Bastani A, Jaberzadeh S. Does anodal transcranial direct current stimulation enhance excitability of the motor cortex and motor function in healthy individuals and subjects with stroke: A systematic review and meta-analysis. *Clin Neurophysiol* 2012;123:644-657.
- e-7. DaSilva AF, Mendonca ME, Zaghi S, et al. tDCS-Induced analgesia and electrical fields in pain-related neural networks in chronic migraine. *Headache* 2012;52:1283-1295.
- e-8. Fregni F, Freedman S, Pascual-Leone A. Recent advances in the treatment of chronic pain with non-invasive brain stimulation techniques. *Lancet Neurol* 2007;6:188-191.
- e-9. Ferrucci R, Mameli F, Guidi I, et al. Transcranial direct current stimulation improves recognition memory in Alzheimer disease. *Neurology* 2008;71:493-498.
- e-10. Boggio PS, Khoury LP, Martins DCS, Martins O, de Macedo EC, Fregni F. Temporal cortex direct current stimulation enhances performance on a visual recognition memory task in Alzheimer disease. *Journal of Neurology Neurosurgery and Psychiatry* 2009;80:444-447.
- e-11. Boggio PS, Ferrucci R, Rigonatti SP, et al. Effects of transcranial direct current stimulation on working memory in patients with Parkinson's disease. *J Neurol Sci* 2006;249:31-38.
- e-12. Jo JM, Kim YH, Ko MH, Ohn SH, Joen B, Lee KH. Enhancing the working memory of stroke patients using tDCS. *Am J Phys Med Rehabil* 2009;88:404-409.
- e-13. Boggio PS, Sultani N, Fecteau S, et al. Prefrontal cortex modulation using transcranial DC stimulation reduces alcohol craving: A double-blind, sham-controlled study. *Drug Alcohol Depend* 2008;92:55-60.

- e-14. Fregni F, Liguori P, Fecteau S, Nitsche MA, Pascual-Leone A, Boggio PS. Cortical stimulation of the prefrontal cortex with transcranial direct current stimulation reduces cue-provoked smoking craving: A randomized, sham-controlled study. *J Clin Psychiatry* 2008;69:32-40.
- e-15. Brunoni AR, Ferrucci R, Fregni F, Boggio PS, Priori A. Transcranial direct current stimulation for the treatment of major depressive disorder: A summary of preclinical, clinical and translational findings. *Prog Neuropsychopharmacol Biol Psychiatry* 2012;39:9-16.
- e-16. Holland R, Crinion J. Can tDCS enhance treatment of aphasia after stroke? *Aphasiology* 2012;26:1169-1191.
- e-17. Elsner B, Kugler J, Pohl M, Mehrholz J. Transcranial direct current stimulation (tDCS) for improving aphasia in patients after stroke. *Cochrane Database of Systematic Reviews* 2013, Issue 6. Art. No.: CD009760. DOI: 10.1002/14651858.CD009760.pub2.
- e-18. Ko MH, Han SH, Park SH, Seo JH, Kim YH. Improvement of visual scanning after DC brain polarization of parietal cortex in stroke patients with spatial neglect. *Neurosci Lett* 2008;448:171-174.
- e-19. Bolognini N, Vallar G, Casati C, et al. Neurophysiological and behavioral effects of tDCS combined with constraint-induced movement therapy in poststroke patients. *Neurorehabil Neural Repair* 2011;25:819-829.
- e-20. Boggio PS, Amancio EJ, Correa CF, et al. Transcranial DC Stimulation Coupled With TENS for the Treatment of Chronic Pain A Preliminary Study. *Clin J Pain* 2009;25:691-695.
- e-21. Plow EB, Obretenova SN, Halko MA, et al. Combining visual rehabilitative training and noninvasive brain stimulation to enhance visual function in patients with hemianopia: a comparative case study. *PM R* 2011;3:825-835.
- e-22. Montenegro RA, Rano AH, Cunha FA, Gurgel JL, Fontes EB, Farinatti PTV. Prefrontal cortex transcranial direct current stimulation associated with aerobic exercise change aspects of appetite sensation in overweight adults. *Appetite* 2012;58:333-338.
- e-23. Goedert KM, Boston RC, and Barrett AM. Advancing the science of spatial neglect rehabilitation: an improved statistical approach with mixed linear modeling. *Front Hum Neurosci* 2013; 7: 211.
